# Supplementary material for: A two-dimensional metallic SnB monolayer as an anode material for non-lithium-ion batteries
Source: Royal Society of Chemistry journal article supplement (doi:10.1039/d2cp03942g), 2022-01-01
Supplement: d2cp03942g1.pdf [file d2cp03942g1.pdf]

## Two-Dimensional Metallic SnB Monolayer as an Anode Material for Non-lithium-ion Batteries

Yue Kuai<sup>a</sup>, Changcheng Chen<sup>a,\*</sup>, Elyas Abduryim<sup>a</sup>, Shuli Gao<sup>a</sup>, Wen Chen<sup>a</sup>, Ge Wu<sup>a</sup>, Liyuan Wu<sup>b</sup>,  
Chao Dong<sup>c</sup>, Weixia Zou<sup>c,\*</sup>, Pengfei Lu<sup>c,\*</sup>

<sup>a</sup> School of Science, Xi'an University of Architecture and Technology, Xi'an, 710055, China.

<sup>b</sup> CAS Key Laboratory for Biomedical Effects of Nanomaterials and Nanosafety, Institute of High Energy Physics, Chinese Academy of Sciences, Beijing 100049, P. R. China

<sup>c</sup> State Key Laboratory of Information Photonics and Optical Communications, Beijing University of Posts and Telecommunications, Beijing, 100876, China.

Email: [chenchangcheng@xauat.edu.cn](mailto:chenchangcheng@xauat.edu.cn) (C. Chen), [wuly@bupt.edu.cn](mailto:wuly@bupt.edu.cn) (L. Wu), [photon.bupt@gmail.com](mailto:photon.bupt@gmail.com) (P. Lu)

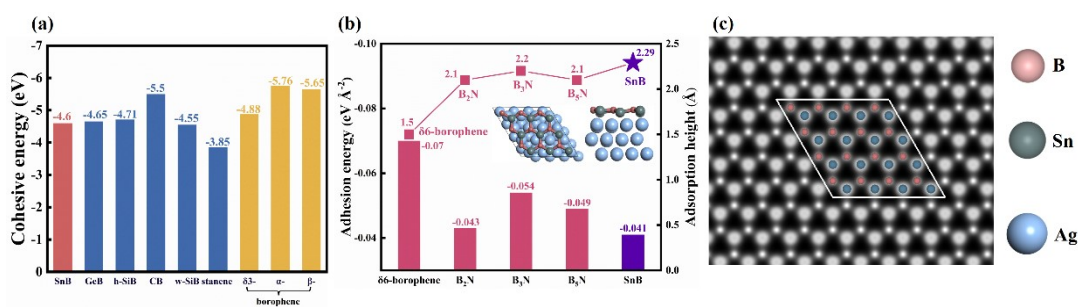

**Fig. S1** (a) The comparison of cohesive energy between SnB monolayer and other two-dimensional material. (b) The adhesion energy and adsorption height between  $\delta 6$ -borophene, B<sub>2</sub>N, B<sub>3</sub>N, B<sub>5</sub>N and the Ag (111) substrate. (c) Simulated STM image of SnB monolayer.

The volume expansions of Na<sub>x</sub>SnB, K<sub>x</sub>SnB and Mg<sub>x</sub>SnB at equilibrium volumes were calculated and expressions is given by

$$\Delta V = \frac{V_n - V_0}{V_0} \times 100\% \quad (1)$$

where,  $V_n$  is the volume of Na<sub>x</sub>SnB, K<sub>x</sub>SnB and Mg<sub>x</sub>SnB.  $V_0$  is the volume of SnB monolayer.

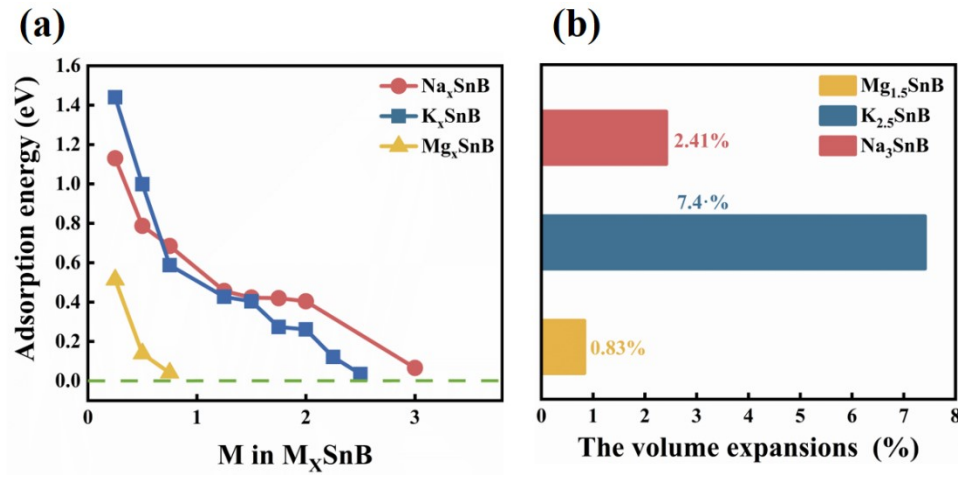

**Fig. S2** (a) Adsorption energy in a Na, K, and Mg-ions adsorbed SnB monolayer as a function of Na, K, and Mg-ions concentration  $x$ . (b) Volume expansions of  $\text{Na}_3\text{SnB}$ ,  $\text{K}_{2.5}\text{SnB}$  and  $\text{Mg}_{1.5}\text{SnB}$ .
